# Supplementary material
Source: ML conference proceedings conference paper supplement (https://proceedings.neurips.cc/paper_files/paper/2022/hash/869bfd807a513755bef25e3896a19a21-Abstract.html)
Supplement: Supplementary file 1 [file 869bfd807a513755bef25e3896a19a21-Supplemental-Conference.pdf]

---

# Appendix for "Fine-Tuning Pre-Trained Language Models Effectively by Optimizing Subnetworks Adaptively"

---

Haojie Zhang<sup>1</sup>, Ge Li<sup>1\*</sup>, Jia Li<sup>1</sup>, Zhongjin Zhang<sup>1</sup>, Yuqi Zhu<sup>1</sup>, Zhi Jin<sup>1</sup>

<sup>1</sup>Key Laboratory of High Confidence Software Technologies (Peking University),  
Ministry of Education; Institute of Software, EECS, Peking University, Beijing, China  
zhanghaojie@stu.pku.edu.cn, lige@pku.edu.cn

lijia@stu.pku.edu.cn, zjz123@stu.pku.edu.cn, zhuyuqi97@gmail.com, zhijin@pku.edu.cn

## A Appendix A. Case Study

In Sec.3.3, we have experimentally verified that DPS outperforms various fine-tuning methods. To understand what type of cases DPS predicts more accurately and justify the effectiveness of DPS from another perspective, we conduct case study. Specifically, we fine-tune BERT<sub>LARGE</sub> on RTE with 10 random restarts and count the overall proportion of easy cases (cases with more than 5 accurate predictions out of 10) and hard cases (cases with more than 5 predictions incorrect out of 10). Figure 1 summarizes the statistics. Compared with various baselines, DPS has the largest proportion of easy cases and the smallest proportion of hard cases. This demonstrates that compared with vanilla fine-tuning, Mixout, and CHILD-TUNING, DPS can better maintain general contextual representation, explore the potential value of data and models, and thus solve difficult cases without affecting the ability to identify easy cases, which is ultimately reflected in the improvement of metrics.

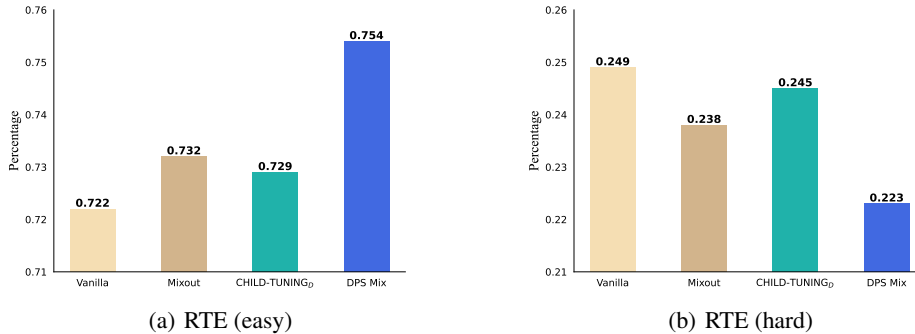

Figure 1: Subfigure.(a) summarizes the percentage of easy cases on various methods; Subfigure.(b) summarizes the percentage of hard cases on various methods.

## B Appendix B. GLUE Benchmark Datasets

we conduct experiments on 8 datasets in GLUE benchmark Wang et al. [2019], the dataset statistics for each task are illustrated in Table 1. we also provide a brief description for each dataset:

- RTE**: Binary entailment classification task Bentivogli et al. [2009]
- MRPC**: Semantic similarity Dolan and Brockett [2005]

- STS-B**: Semantic textual similarity Cer et al. [2017]
- CoLA**: Acceptability classification Warstadt et al. [2019]
- SST-2**: Binary sentiment classification Socher et al. [2013]
- QNLI**: Binary question inference classification Rajpurkar et al. [2016]
- QQP**: Binary semantically equivalent classification Shankar Iyer and Csernai. [2017]
- MNLI**: Textual entailment classification Williams et al. [2018]

| Dataset               | RTE  | MRPC | STS-B | CoLA | SST-2 | QNLI | QQP  | MNLI |
|-----------------------|------|------|-------|------|-------|------|------|------|
| <b>Train Examples</b> | 2.5k | 3.7k | 5.7k  | 8.5k | 67k   | 105k | 364k | 393k |
| <b>Dev Examples</b>   | 277  | 408  | 1.5k  | 1.0k | 872   | 5.5k | 40k  | 4.8k |
| <b>Metrics</b>        | Acc  | F1   | SCC   | MCC  | Acc   | Acc  | Acc  | Acc  |

Table 1: Eight datasets used in this paper form GLUE benchmark. Acc stands for Accuracy, SCC stands for Spearman Correlation Coefficient and MCC stands for Matthews Correlation Coefficient.

## C Appendix C. Hyper-parameters and Experimental Details of Different Pre-trained Language Models

In this paper, we investigate the performance of DPS on five distinctive and widely used large-scale pre-trained language models, namely BERT Devlin et al. [2018], RoBERTa Liu et al. [2019], ELECTRA Clark et al. [2020], BART Lewis et al. [2019], and DeBERTa He et al. [2021]. BERT is the first Transformer Vaswani et al. [2017] encoder based pre-trained language model with Mask Language Modeling and Next Sentence Prediction pre-training tasks. RoBERTa is similar to BERT in terms of model architecture but is only pre-trained on the Mask Language Modeling task only, but for longer and on more data. ELECTRA is a BERT-like model trained to distinguish tokens generated by masked language model from tokens drawn from the natural distribution. BART is a sequence-to-sequence model trained as a denoising autoencoder. DeBERTa improves Transformer-based pre-trained model with disentangled attention mechanism and enhanced mask decoder. Table 2 summarizes the hyper-parameters of each model for each dataset. We use AdamW Loshchilov and Hutter [2019] optimizer, clip the gradients with a maximum norm of 1, and the maximum sequence length is set as 128. We use mixed precision training to speed up the experimental process. We conduct all the experiments on a single Tesla-V100 GPU (32G).

| Model   | Datasets | Batch Size | Learning Rate | Training Epochs/Steps | Warmup Ratio/Steps | LLRD |
|---------|----------|------------|---------------|-----------------------|--------------------|------|
| BERT    | all      | 16         | 2e-5          | 3 epochs              | 10%                | -    |
| RoBERTa | RTE      | 16         | 2e-5          | 2036 steps            | 122 steps          | -    |
|         | MRPC     | 16         | 1e-5          | 2296 steps            | 137 steps          | -    |
|         | STS-B    | 16         | 2e-5          | 3598 steps            | 214 steps          | -    |
|         | CoLA     | 16         | 1e-5          | 5336 steps            | 320 steps          | -    |
| ELECTRA | RTE      | 32         | 5e-5          | 10 epochs             | 10%                | 0.9  |
|         | MRPC     | 32         | 5e-5          | 3 epochs              | 10%                | 0.9  |
|         | STS-B    | 32         | 5e-5          | 10 epochs             | 10%                | 0.9  |
|         | CoLA     | 32         | 5e-5          | 3 epochs              | 10%                | 0.9  |
| BART    | RTE      | 32         | 1e-5          | 3 epochs              | 10%                | -    |
|         | MRPC     | 64         | 2e-5          | 3 epochs              | 10%                | -    |
|         | STS-B    | 32         | 2e-5          | 3 epochs              | 10%                | -    |
|         | CoLA     | 64         | 2e-5          | 3 epochs              | 10%                | -    |
| BEBERTA | RTE      | 32         | 1e-5          | 6 epochs              | 50 steps           | -    |
|         | MRPC     | 32         | 1e-5          | 6 epochs              | 50 steps           | -    |
|         | STS-B    | 32         | 7e-6          | 4 epochs              | 100 steps          | -    |
|         | CoLA     | 32         | 7e-6          | 6 epochs              | 100 steps          | -    |

Table 2: Fine-tuning hyper-parameters of BERT and its variants as reported in the official repository of each model for best practice. Note that Layer-wise Learning Rate Decay (LLRD) Howard and Ruder [2018] is a method that applies higher learning rates for top layers and lower learning rates for bottom layers. This method is applied by ELECTRA when fine-tuning downstream tasks.

## D Appendix D. Experimental Details for Different Fine-tuning Methods

The following is our hyperparameter search space for different fine-tuning regularization methods:

- Mixout** We grid search Mixout probability  $p \in \{0.1, 0.2, 0.3, 0.4, 0.5, 0.6, 0.7, 0.8\}$ .
- R3F**: We grid search Noise Types  $\in \{\mathcal{N}, \mathcal{U}\}$ ,  $\sigma \in \{1e-5\}$ ,  $\lambda \in \{0.1, 0.5, 1.0, 5.0\}$ .
- Re-init**: We grid search  $L \in \{1, 2, 3, 4, 5, 6, 7\}$ .
- CHILD-TUNING<sub>D</sub>**: We grid search CHILD-TUNING<sub>D</sub>  $p_D \in \{0.1, 0.2, 0.3\}$ , and learning rate  $lr \in \{2e-5, 4e-5, 6e-5, 8e-5, 1e-4\}$ .
- R-Dropout**: We grid search Dropout probability  $p \in \{0.1\}$  and  $\alpha \in \{0.1, 0.5, 1, 3, 5\}$ .
- DPS Dense**: We grid search reserved probability  $p \in \{0.1, 0.2, 0.3, 0.4, 0.5\}$  and update ratio  $ur \in \{0.05, 0.1, 0.2\}$ .
- DPS Mix**: We grid search reserved probability  $p \in \{0.1, 0.2, 0.3, 0.4, 0.5\}$ , and update ratio  $ur \in \{0.05, 0.1, 0.2\}$ .

## E Appendix E. Mapping Strategy

We train DPS on SNLI and MNLI datasets respectively and evaluate several different target NLI datasets. The SNLI and MNLI datasets contain three labels: entailment, neutral, and contradiction, however, some datasets have only two labels (SciTail, RTE). The SciTail dataset contains two labels: entailment, neutral, and we map the predicted labels neutral and contradiction to neutral, following Mahabadi et al. [2021]. We conduct the same process for RTE.

## F Appendix F. Memory Consumption

In addition to time usage, we further analyze memory consumption of various approaches when fine-tuning BERT<sub>LARGE</sub>. The table below shows the results. DPS Dense requires extra memory because it needs to store Gradient Accumulation Matrix (*GAM*), DPS Mix requires more memory than DPS Dense because it needs to store Frequency Accumulation Matrix (*FAM*) and *GAM*. It is worth noting that since the size of *GAM* and *FAM* is fixed, the additional memory consumption introduced by DPS does not increase as the batch size increases. Therefore, as the batch size increases, the percentage of additional memory consumption decreases for DPS compared to vanilla fine-tuning. Overall, DPS does introduce additional memory overhead, but we believe that the memory consumption for DPS is acceptable compared to other regularization methods.

| Batch Size | Vanilla | Mixout | R3F   | R-Dropout | CHILD-TUNING <sub>D</sub> | DPS Dense | DPS Mix |
|------------|---------|--------|-------|-----------|---------------------------|-----------|---------|
| 16         | 10.6G   | 12.9G  | 17.7G | 17.7G     | 10.9G                     | 16.3G     | 21.1G   |
| 32         | 14.3G   | 16.3G  | 28.3G | 28.3G     | 14.7G                     | 20.0G     | 24.7G   |

Table 3: Memory consumption for DPS and multiple fine-tuning regularization methods.

## References

- Alessandro Achille, Giovanni Paolini, and Stefano Soatto. Where is the information in a deep neural network? *arXiv preprint arXiv:1905.12213*, 2019.
- Armen Aghajanyan, Akshat Shrivastava, Ankit Gupta, Naman Goyal, Luke Zettlemoyer, and Sonal Gupta. Better fine-tuning by reducing representational collapse. In *ICLR*, 2021.
- Shun-ichi Amari. Neural learning in structured parameter spaces-natural riemannian gradient. In *NeurIPS*, 1996.
- Yonatan Belinkov, Adam Poliak, Stuart M Shieber, Benjamin Van Durme, and Alexander M Rush. On adversarial removal of hypothesis-only bias in natural language inference. In *StarSem*, 2019.

- Luisa Bentivogli, Peter Clark, Ido Dagan, and Danilo Giampiccolo. The fifth pascal recognizing textual entailment challenge. In *TAC*, 2009.
- Samuel R Bowman, Gabor Angeli, Christopher Potts, and Christopher D Manning. A large annotated corpus for learning natural language inference. In *EMNLP*, 2015.
- Tom Brown, Benjamin Mann, Nick Ryder, Melanie Subbiah, Jared D Kaplan, Prafulla Dhariwal, Arvind Neelakantan, Pranav Shyam, Girish Sastry, Amanda Askell, et al. Language models are few-shot learners. In *NeurIPS*, 2020.
- Daniel Cer, Mona Diab, Eneko Agirre, Inigo Lopez-Gazpio, and Lucia Specia. Semeval-2017 task 1: Semantic textual similarity-multilingual and cross-lingual focused evaluation. *arXiv preprint arXiv:1708.00055*, 2017.
- Kevin Clark, Minh-Thang Luong, Quoc V Le, and Christopher D Manning. Electra: Pre-training text encoders as discriminators rather than generators. In *ICLR*, 2020.
- Elliot J Crowley, Jack Turner, Amos Storkey, and Michael O’Boyle. Pruning neural networks: is it time to nip it in the bud? 2018.
- Jacob Devlin, Ming-Wei Chang, Kenton Lee, and Kristina Toutanova. Bert: Pre-training of deep bidirectional transformers for language understanding. In *NAACL*, 2018.
- Jesse Dodge, Gabriel Ilharco, Roy Schwartz, Ali Farhadi, Hannaneh Hajishirzi, and Noah Smith. Fine-tuning pretrained language models: Weight initializations, data orders, and early stopping. *arXiv preprint arXiv:2002.06305*, 2020.
- Bill Dolan and Chris Brockett. Automatically constructing a corpus of sentential paraphrases. In *IWP*, 2005.
- Ronald A Fisher. On the mathematical foundations of theoretical statistics. *Philosophical transactions of the Royal Society of London. Series A, containing papers of a mathematical or physical character*, 222(594-604):309–368, 1922.
- Pengcheng He, Xiaodong Liu, Jianfeng Gao, and Weizhu Chen. DeBERTa: Decoding-enhanced bert with disentangled attention. In *ICLR*, 2021.
- Jeremy Howard and Sebastian Ruder. Universal language model fine-tuning for text classification. In *ACL*, 2018.
- Tushar Khot, Ashish Sabharwal, and Peter Clark. Scitail: A textual entailment dataset from science question answering. In *AAAI*, 2018.
- James Kirkpatrick, Razvan Pascanu, Neil Rabinowitz, Joel Veness, Guillaume Desjardins, Andrei A Rusu, Kieran Milan, John Quan, Tiago Ramalho, Agnieszka Grabska-Barwinska, et al. Overcoming catastrophic forgetting in neural networks. In *PNAS*, 2017.
- Cheolhyun Lee, Kyunghyun Cho, and Wanmo Kang. Mixout: Effective regularization to finetune large-scale pretrained language models. In *ICLR*, 2020.
- Mike Lewis, Yinhan Liu, Naman Goyal, Marjan Ghazvininejad, Abdelrahman Mohamed, Omer Levy, Ves Stoyanov, and Luke Zettlemoyer. Bart: Denoising sequence-to-sequence pre-training for natural language generation, translation, and comprehension. *arXiv preprint arXiv:1910.13461*, 2019.
- Yinhan Liu, Myle Ott, Naman Goyal, Jingfei Du, Mandar Joshi, Danqi Chen, Omer Levy, Mike Lewis, Luke Zettlemoyer, and Veselin Stoyanov. Roberta: A robustly optimized bert pretraining approach. *arXiv preprint arXiv:1907.11692*, 2019.
- Ilya Loshchilov and Frank Hutter. Decoupled weight decay regularization (2017). *arXiv preprint arXiv:1711.05101*, 2019.
- Rabeeh Karimi Mahabadi, Yonatan Belinkov, and James Henderson. Variational information bottleneck for effective low-resource fine-tuning. In *ICLR*, 2021.

- Marco Marelli, Stefano Menini, Marco Baroni, Luisa Bentivogli, Raffaella Bernardi, and Roberto Zamparelli. A sick cure for the evaluation of compositional distributional semantic models. In *LREC*, 2014.
- James Martens. New insights and perspectives on the natural gradient method. *arXiv preprint arXiv:1412.1193*, 2014.
- Marius Mosbach, Maksym Andriushchenko, and Dietrich Klakow. On the stability of fine-tuning bert: Misconceptions, explanations, and strong baselines. In *ICLR*, 2021.
- Razvan Pascanu and Yoshua Bengio. Revisiting natural gradient for deep networks. *arXiv preprint arXiv:1301.3584*, 2013.
- Jason Phang, Thibault F  vry, and Samuel R Bowman. Sentence encoders on stilts: Supplementary training on intermediate labeled-data tasks. *arXiv preprint arXiv:1811.01088*, 2018.
- Colin Raffel, Noam Shazeer, Adam Roberts, Katherine Lee, Sharan Narang, Michael Matena, Yanqi Zhou, Wei Li, and Peter J Liu. Exploring the limits of transfer learning with a unified text-to-text transformer. *arXiv preprint arXiv:1910.10683*, 2019.
- Pranav Rajpurkar, Jian Zhang, Konstantin Lopyrev, and Percy Liang. Squad: 100,000+ questions for machine comprehension of text. In *EMNLP*, 2016.
- Nikhil Dandekar Shankar Iyer and Kornel Csernai. First quora dataset release: Question pairs. <https://tinyurl.com/y2y8u5ed>, 2017.
- Karen Simonyan and Andrew Zisserman. Very deep convolutional networks for large-scale image recognition. *arXiv preprint arXiv:1409.1556*, 2014.
- Sidak Pal Singh and Dan Alistarh. Woodfisher: Efficient second-order approximation for neural network compression. In *NeurIPS*, 2020.
- Richard Socher, Alex Perelygin, Jean Wu, Jason Chuang, Christopher D Manning, Andrew Y Ng, and Christopher Potts. Recursive deep models for semantic compositionality over a sentiment treebank. In *EMNLP*, 2013.
- Lucas Theis, Iryna Korshunova, Alykhan Tejani, and Ferenc Husz  r. Faster gaze prediction with dense networks and fisher pruning. *arXiv preprint arXiv:1801.05787*, 2018.
- Ming Tu, Visar Berisha, Martin Woolf, Jae-sun Seo, and Yu Cao. Ranking the parameters of deep neural networks using the fisher information. In *ICASSP*, 2016.
- Ashish Vaswani, Noam Shazeer, Niki Parmar, Jakob Uszkoreit, Llion Jones, Aidan N Gomez, Łukasz Kaiser, and Illia Polosukhin. Attention is all you need. In *NeurIPS*, 2017.
- Alex Wang, Amanpreet Singh, Julian Michael, Felix Hill, Omer Levy, and Samuel R Bowman. Glue: A multi-task benchmark and analysis platform for natural language understanding. In *ICLR*, 2019.
- Alex Warstadt, Amanpreet Singh, and Samuel R Bowman. Neural network acceptability judgments. *Transactions of the Association for Computational Linguistics*, 7:625–641, 2019.
- Adina Williams, Nikita Nangia, and Samuel R Bowman. A broad-coverage challenge corpus for sentence understanding through inference. In *NAACL*, 2018.
- Thomas Wolf, Lysandre Debut, Victor Sanh, Julien Chaumond, Clement Delangue, Anthony Moi, Pierric Cistac, Tim Rault, R  mi Louf, Morgan Funtowicz, et al. Transformers: State-of-the-art natural language processing. In *EMNLP*, 2020.
- Lijun Wu, Juntao Li, Yue Wang, Qi Meng, Tao Qin, Wei Chen, Min Zhang, Tie-Yan Liu, et al. R-drop: regularized dropout for neural networks. In *NeurIPS*, 2021.
- Runxin Xu, Fuli Luo, Zhiyuan Zhang, Chuanqi Tan, Baobao Chang, Songfang Huang, and Fei Huang. Raise a child in large language model: Towards effective and generalizable fine-tuning. In *EMNLP*, 2021.

Zhilin Yang, Zihang Dai, Yiming Yang, Jaime Carbonell, Russ R Salakhutdinov, and Quoc V Le. Xlnet: Generalized autoregressive pretraining for language understanding. In *NeurIPS*, 2019.

Tianyi Zhang, Felix Wu, Arzoo Katiyar, Kilian Q Weinberger, and Yoav Artzi. Revisiting few-sample bert fine-tuning. In *ICLR*, 2021.
